# 1 **Measuring the distribution of fitness effects in somatic evolution by combining clonal** 2 **dynamics with dN/dS ratios**

3

4 Marc J Williams<sup>1</sup>, Luiz Zapata<sup>2</sup>, Benjamin Werner<sup>2</sup>, Chris Barnes<sup>3</sup>, Andrea Sottoriva<sup>2\*</sup>, Trevor  
5 A Graham<sup>1\*</sup>

6

7 <sup>1</sup> Barts Cancer Institute, Barts and the London School of Medicine and Dentistry, Queen Mary  
8 University of London, UK

9 <sup>2</sup> Centre for Evolution and Cancer, Institute of Cancer Research, London, UK

10 <sup>3</sup> Department of Cell and Developmental Biology, University College London, UK

11

12 \* Correspondence to: [andrea.sottoriva@icr.ac.uk](mailto:andrea.sottoriva@icr.ac.uk) and [t.graham@qmul.ac.uk](mailto:t.graham@qmul.ac.uk)

13

14

## 15 **Abstract**

16 The distribution of fitness effects (DFE) defines how new mutations spread through an  
17 evolving population. The ratio of non-synonymous to synonymous mutations (dN/dS) has  
18 become a popular method to detect selection in somatic cells, however the link, in somatic  
19 evolution, between dN/dS values and fitness coefficients is missing. Here we present a  
20 quantitative model of somatic evolutionary dynamics that yields the selective coefficients  
21 from individual driver mutations from dN/dS estimates, and then measure the DFE for  
22 somatic mutant clones in ostensibly normal oesophagus and skin. We reveal a broad  
23 distribution of fitness effects, with the largest fitness increases found for TP53 and NOTCH1  
24 mutants (proliferative bias 1-5%). Accurate measurement of the per-gene DFE in cancer  
25 evolution is precluded by the quality of currently available sequencing data. This study  
26 provides the theoretical link between dN/dS values and selective coefficients in somatic  
27 evolution, and reveals the DFE for mutations in human tissues.

28

29

## 30 **Introduction**

31

32 One of the principal goals of large-scale somatic genome sequencing is to uncover genetic loci  
33 under positive selection, so-called “driver” genes, that lead to clonal expansions.  
34 Enumeration of the selective advantage of each driver mutation enables prediction of future  
35 evolutionary dynamics<sup>1</sup>. In evolutionary biology, the distribution of fitness effects (DFE) is a  
36 fundamental entity that describes the selective consequences of a (large) number of  
37 individual mutations of an ancestral genome<sup>2</sup>. In somatic evolution, particularly cancer  
38 genomes, we have an extensive knowledge of the catalogue of recurrent, and likely positively  
39 selected, somatic mutations<sup>3</sup>, but the fitness changes associated with each mutation remain  
40 largely unquantified.

41

42 Extensive experimental effort is ongoing to determine the fitness effects of mutations. Most  
43 prominently is lineage tracing of mutations in mouse models<sup>4,5</sup>, but these methods are not  
44 sufficiently high-throughput to produce the DFE for all somatic mutations. Other studies have  
45 estimated the selective coefficient of somatic mutations by measuring the frequency of such  
46 mutations over time in the same individual using longitudinal sampling<sup>6,7</sup> however this  
47 method is broadly limited to somatic evolution in the blood (where it is feasible to take

48 samples from healthy individuals over time) and in rare cases of patients under active  
49 surveillance.

50

51 An alternative approach is to infer selective coefficients directly from somatic genome  
52 sequencing data. Methods to identify positively-selected (driver) mutations rely on finding  
53 genes that have significantly more mutational ‘hits’ (typically hits are non-synonymous  
54 mutations) than would be expected by chance, after correction for factors known to influence  
55 the mutation rate across the genome<sup>8</sup>. Conversely, negatively selected genes are expected to  
56 show a paucity of mutations<sup>9,10</sup>. This idea is formalised in the calculation of the dN/dS ratio  
57 – a method originally developed in molecular species evolution – that has recently been  
58 adapted for use to study somatic evolution (both cancer and normal tissue)<sup>3,9-15</sup>. The intuitive  
59 idea behind dN/dS is to measure the rate of non-synonymous (dN) mutations (possibly under  
60 selection) and compare that to the rate of synonymous (dS) mutations (presumed neutral).  
61 The ratio of these two numbers, each normalised for the local sequence-specific biases in the  
62 mutation rate, putatively identifies a signature of selection: dN/dS > 1 indicating positive  
63 selection, dN/dS = 1 indicating neutral evolution and dN/dS < 1 indicating negative selection.

64

65 Transforming dN/dS values to selective coefficients in somatic evolution is an unaddressed  
66 problem. dN/dS was originally developed in the context of species evolution using the  
67 Wright-Fisher process, a classical population genetics model that assumes that evolution  
68 occurs over very long timescales, which permits new mutations to fix within lineages, and also  
69 that the population size is constant, with all individuals having equal potency and non-  
70 overlapping generations. Under the Wright-Fisher model, the dN/dS of a locus is related to its  
71 selective coefficient by the relation<sup>16</sup>:

$$72 \quad \frac{dN}{dS} = \frac{2Ns}{1 - e^{-2Ns}}$$

73

74 Where  $N$  is the effective population size and  $s$  the selection coefficient.

75

76 However, in somatic evolution the assumptions of the Fisher-Wright model are violated.  
77 Somatic evolution is rapid and new mutations are infrequently fixed in the population<sup>17</sup>,  
78 clonal dynamics are complex and population sizes unlikely to be constant<sup>18</sup>. Further, the lack  
79 of recombination in somatic evolution can result in strong hitchhiking effects. In addition,  
80 since in somatic evolution the ancestral genome is known it circumvents the need to measure  
81 dN/dS across a phylogeny (a necessary step for dN/dS analysis in species evolution).  
82 Violations of some of these assumptions was previously recognised to make the  
83 interpretation of dN/dS problematic<sup>19,20</sup>, and consequently the relationship between  
84 selective coefficients and dN/dS values is uncertain.

85

86 The size distribution of clones (called the site frequency spectrum in population genetics  
87 nomenclature) also contains information on the selective coefficients of newly arising  
88 mutations. Mathematical descriptions of the dynamics of populations of cells can make  
89 predictions on the shape of the clone size distribution under different demographic and  
90 evolutionary models<sup>21,22</sup>, and this approach has been used to quantify the dynamics and cell  
91 fate properties of stem cells across many tissues<sup>23-25</sup>. We and others have also used similar  
92 approaches to infer the evolutionary dynamics of tumours in deep sequencing data<sup>26-29</sup>.

93 To date, dN/dS analysis and the analysis of the clone size distribution have been performed  
94 independently, with conflictual results<sup>30,31</sup>. Here we develop the mathematical population  
95 genetics theory necessary to combine these approaches and explore how the inter-  
96 individual measure of selection at a locus as provided by dN/dS values is related to the  
97 underlying cell population dynamics that generate intra-individual clone size distributions.  
98 This approach naturally accounts for the nuances in somatic evolution that can make the  
99 interpretation of dN/dS difficult. We show how this unified approach allows for greater  
100 insight into patterns of selection than either method in isolation, and importantly reveal the  
101 precise mathematical relationship between dN/dS values and selective coefficients in  
102 somatic evolution. We use this approach to infer the selective advantage of mutations in  
103 normal tissue and examine the evolutionary dynamics of cancer subclones.

104

## 105 **Results**

106

### 107 **A general approach to integrate dN/dS and clone size distributions**

108 We present a general mathematical framework for the interpretation of frequency-  
109 dependent dN/dS values in somatic evolution. First, we construct null models of the  
110 evolutionary dynamics in the absence of selection, and then augment these models to  
111 incorporate the consequences of selection. Evolutionary dynamics differ between normal  
112 tissues and cancer cells: in normal tissues maintained by stem cells, the long-term  
113 population dynamics is controlled by an approximately fixed-size set of equipotent stem  
114 cells undergoing a process of neutral competition<sup>32</sup>, whereas in tumour growth the overall  
115 population increases over time. In each scenario, we develop a null model to predict the  
116 expected genetic diversity in the population in the absence of selection. Positive selection  
117 causes selected variants to rise to higher frequency than expected under neutral evolution  
118 (Figure 1a), and negative selection has the opposite effect. This insight guides how we  
119 model the effects of selection (i.e diversity of non-synonymous mutations).

120

121 Specifically, we defined the function  $g(\theta, \mu, s, f)$  as the expected distribution of mutations  
122 with selective (dis)advantage  $s$  found at a frequency  $f$ , for a given evolutionary dynamics  
123 scenario, where mutations accumulate at a rate  $\mu$ . For the remainder of the paper we use  
124 passenger mutations to refer to those mutations that have no functional effect ( $s=0$ ) and  
125 driver mutations those that have  $s>0$ . When comparing to data, driver mutations are taken  
126 as equivalent to non-synonymous mutations and passengers equivalent to synonymous  
127 mutations.

128

129 The functional form of  $g(\theta, \mu, s, f)$  encapsulates the population dynamics of the system  
130 with parameter vector  $\theta$ , which may, for example, include the growth rate of a tumour, or  
131 loss replacement rate of stem cells in normal tissue. The direct interpretation of  $s$  depends  
132 on the system under question. Following the logic of the effect of selection above, for  $s' >$   
133  $s$  we have that:

134

$$135 \quad g(\theta, \mu, s', f) > g(\theta, \mu, s, f).$$

136

137

138

139

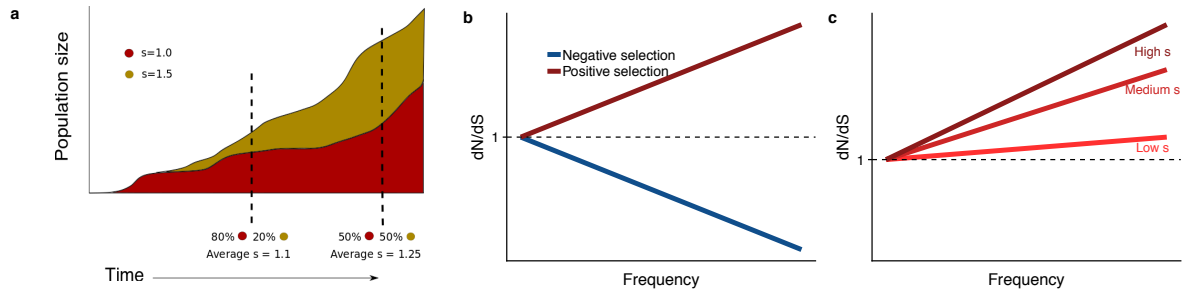

**Figure 1**

**A** Variants under positive selection are enriched at high frequency, this means  $dN/dS$  estimates are dependent on the frequency of mutation, **b**. The strength of selection influences the degree to which positively selected variants are enriched at high frequencies **c**.

Since  $dN/dS$  measures the excess or deficiency of mutations due to selection, taking the ratio of  $g(\theta, s, m)$  when  $s \neq 0$  to  $s = 0$  and normalizing for the mutation rates, which may differ for passenger ( $\mu_p$ ) and driver ( $\mu_d$ ) mutations respectively, informs how  $dN/dS$  is expected to change as a function of the frequency  $f$  of mutations in the population (equation 1).

$$\frac{dN}{dS} = \frac{\mu_p}{\mu_d} \frac{g(\theta, \mu_d, s, f)}{g(\theta, \mu_p, s=0, f)} \quad [1]$$

We discuss the general properties of this model. Firstly, when  $s = 0$  (neutral evolution), the numerator and denominator are equal resulting in  $\frac{dN}{dS} = 1$ , as expected. Secondly,  $dN/dS$  increases as a function of frequency  $f$  (clone size) for positive selection, and decreases as a function of  $f$  for negative selection (Figure 1b), for all  $g(\theta, \mu, s, f)$  that we consider. Thirdly, the shape of the curves predicted by the underlying population model encodes the value of the selection coefficient; for example the steepness of the increase is proportional to the selection coefficient  $s$  (Figure 1c). These observations are a natural consequence of positive selection driving selected mutations to higher frequency (Figure 1a).

Unfortunately, directly using equation [1] to measure selective coefficients from the slope of the  $dN/dS$  curve as function of frequency is often impractical. Real sequencing data often suffers from a limited number of mutations detected at any particular frequency and measurement uncertainties in these frequencies. To circumvent these issues, we introduce “interval  $dN/dS$ ” (i- $dN/dS$ ) that aggregates over a frequency range to reduce the influence of these sources of noise. Interval  $dN/dS$  is defined as:

$$i\text{-}\frac{dN}{dS} = \frac{\mu_p}{\mu_d} \frac{\int_{f_{min}}^{f_{max}} g(\theta, \mu_d, s, f) df}{\int_{f_{min}}^{f_{max}} g(\theta, \mu_p, s=0, f) df} \quad [2]$$

Fixing the integration range  $[f_{min}, f_{max}]$  allows for robust inference of  $s$  in potentially sparse and noisy sequencing data using maximum likelihood methods (see Methods).

### Frequency-dependent $dN/dS$ values in stem cell populations

In healthy tissue, only mutations that are acquired in the stem cells will persist over long times, and so we restrict our attention to these cells. Quantitative analysis of lineage tracing

178 data has shown that the stem cell dynamics of many tissues conform to a process of  
 179 population asymmetry<sup>32</sup>. In this paradigm, under homeostasis, the loss of stem cells through  
 180 differentiation is compensated by the replication of a neighbouring stem cell, thus  
 181 maintaining an approximately constant number of stem cells. These dynamics are  
 182 represented by the rate equations:

$$183 \quad SC \xrightarrow{r\lambda} \begin{cases} SC + SC \\ D + D \end{cases} \begin{cases} p = (1 + \Delta)/2 \\ p = (1 - \Delta)/2 \end{cases} \quad [3]$$

184  
 185 where  $SC$  refers to a single stem cell which divides symmetrically to produce either two  
 186 stem cells or two differentiated cells (denoted as  $D$  above),  $\lambda$  is the rate of cell division per  
 187 unit time, and  $r$  is the probability of a symmetric divisions. The product  $r\lambda$  is referred to as  
 188 the loss/replacement rate. Differentiated cells will ultimately be lost from the population  
 189 over long time scales. Under homeostasis, these processes should be exactly balanced with  
 190  $\Delta = 0$ . With  $\Delta \neq 0$ , the fate of a stem cell is ‘biased’, introducing positive or negative  
 191 selection into the model. Previous mathematical analysis shows that this model is a good  
 192 description of the clonal dynamics in the oesophagus and skin<sup>23,33,34</sup>. Using the previous  
 193 analytical results describing the temporal evolution of the clone distribution (see  
 194 supplementary methods for detailed discussion) we derive the frequency distribution  
 195  $g(\theta, \mu, s, f)$  for oesophagus and skin as<sup>21,23,35</sup>:

$$196 \quad g(\theta, \mu_x, s, f) = \frac{n_0 \mu_x}{f} e^{-\frac{f}{N(t)}} \quad [4]$$

197  
 198 Where  $n_0$  is the starting population size and  $\mu_x$  the mutation rate, which may be different  
 199 for drivers ( $s \neq 0$ ) and passenger mutations ( $s = 0$ ).  $N(t)$  is a scaling factor that depends  
 200 on  $\Delta$ , the bias toward self-renewal, which we interpret as our selection coefficient in this  
 201 system. Specifically:

$$202 \quad N_{\Delta=0}(t) = 1 + r\lambda t \quad [5]$$

$$203 \quad N_{\Delta}(t) = \frac{(1+\Delta)e^{2r\lambda\Delta t} - (1-\Delta)}{2\Delta} \quad [6]$$

204  
 205 We note that at long times (large  $N(t)$ ) equation [4] converges to a  $1/f$  distribution for the  
 206 site frequency spectrum of a fixed size population<sup>36</sup>.  $N(t)$  can be interpreted as the average  
 207 size of a labelled clone after time  $t$ , which even under homeostasis grows over time and  
 208 compensates for some clones being lost due to drift. From these expressions, we can then  
 209 write down a closed-form expression for  $i \cdot dN/dS$  as a function of clone frequency (see  
 210 methods) that allows for maximum likelihood estimation of parameter values ( $\Delta, r\lambda$ ). We  
 211 confirmed the accuracy of our derivation using simulations (Figure 2a), and performed  
 212 power calculations to determine the minimum number of mutations required to correctly  
 213 infer the underlying population dynamics. We determined that 8 mutations per gene was  
 214 sufficient to accurately recover  $\Delta$  (Figure 2b) with accuracy increasing for higher mutation  
 215 burdens (Figure 2c).

216  
 217  
 218  
 219  
 220  
 221

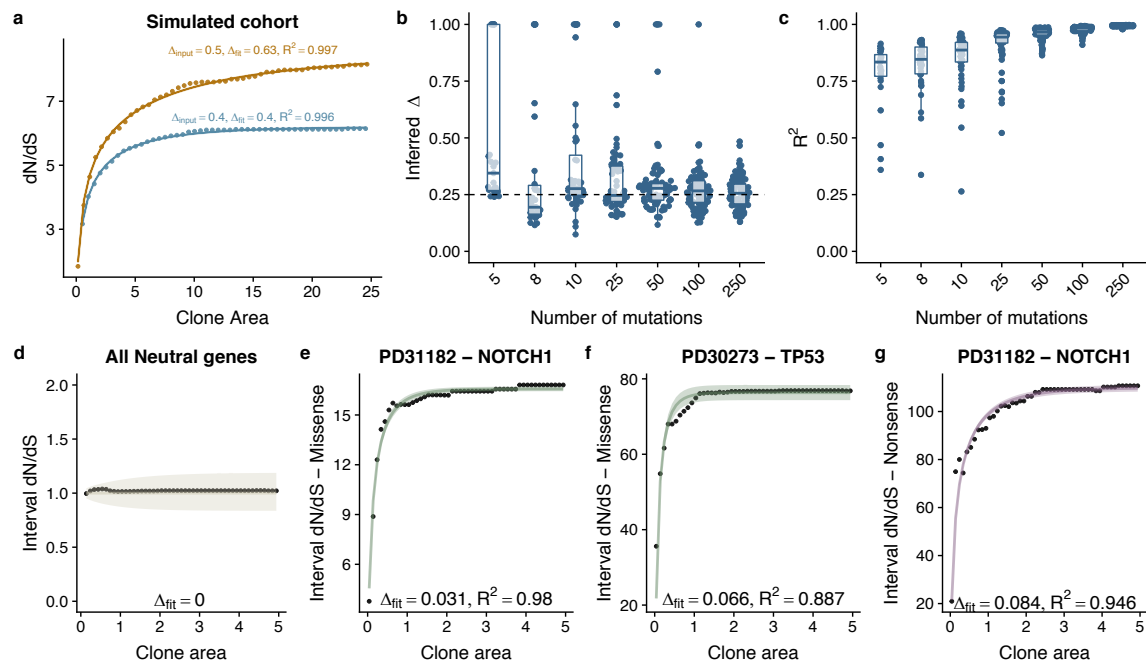

**Figure 2**

a Interval dN/dS as a function of clone area for 2 simulated cohorts where driver mutations induce different biases, theoretical model captures the dynamics well and enables us to recover the bias  $\Delta$ , accurately. As the number of mutations increases ability to recover the correct  $\Delta$  and the model fit (measured using  $R^2$ ) improves b and c. d Data and model fit for all neutral genes, shows i-dN/dS = 1 across the frequency range and inferred bias of 0. Data and model fit for e NOTCH1 missense mutations in patient PD31182, f missense TP53 mutations in PD30273 and NOTCH1 nonsense mutations in PD31182. Data are black points and model fits are solid lines with shaded areas denoting 95% CI.

### Selection advantages in histopathologically normal human oesophagus

We inferred the selective advantage of driver mutations in human oesophagus using published deep sequencing data from Martincorena and colleagues<sup>14,37</sup> that documents the clonal expansion of a panel of putative driver mutations in histopathologically-normal oesophageal biopsies.

We used the dndscv bioinformatics tool<sup>3</sup> to calculate frequency-dependent dN/dS values from these data (clone size measured in fraction of mutant reads multiplied by  $2\text{mm}^2$  – the area of the biopsy – and assuming 5,000 stem cells per  $\text{mm}^2$  tissue). dN/dS values varied considerably as a function of mutation frequency (Figure S1).

We considered the average frequency-dependent dN/dS values across all genes in the panel, on a patient-by-patient basis. Our theoretical model of i-dN/dS calculated from these data fitted strikingly well (Figure S2). Estimates of the loss/replacement rate  $r\lambda$  of the stem cell population were in the range 1.2-5.0 per year (Figure S2&S3). Inference of the selective advantage  $s$  (measured in terms of the bias towards self renewal  $\Delta$ ) revealed an average bias of 0.004 (0.002 – 0.005 95% CI) per missense mutation (Figure S2). Nonsense mutations caused a five-fold greater bias towards self-renewal of 0.021 (0.008 – 0.032 95% CI) (Figure S3). After removal of all genes that are strongly selected, global dN/dS values on the remaining 48 genes show dN/dS of approximately 1 across the frequency range (Figure 2d), and i-dN/dS analysis revealed somatic mutation does not associate with a proliferative bias ( $\Delta=0$ ).

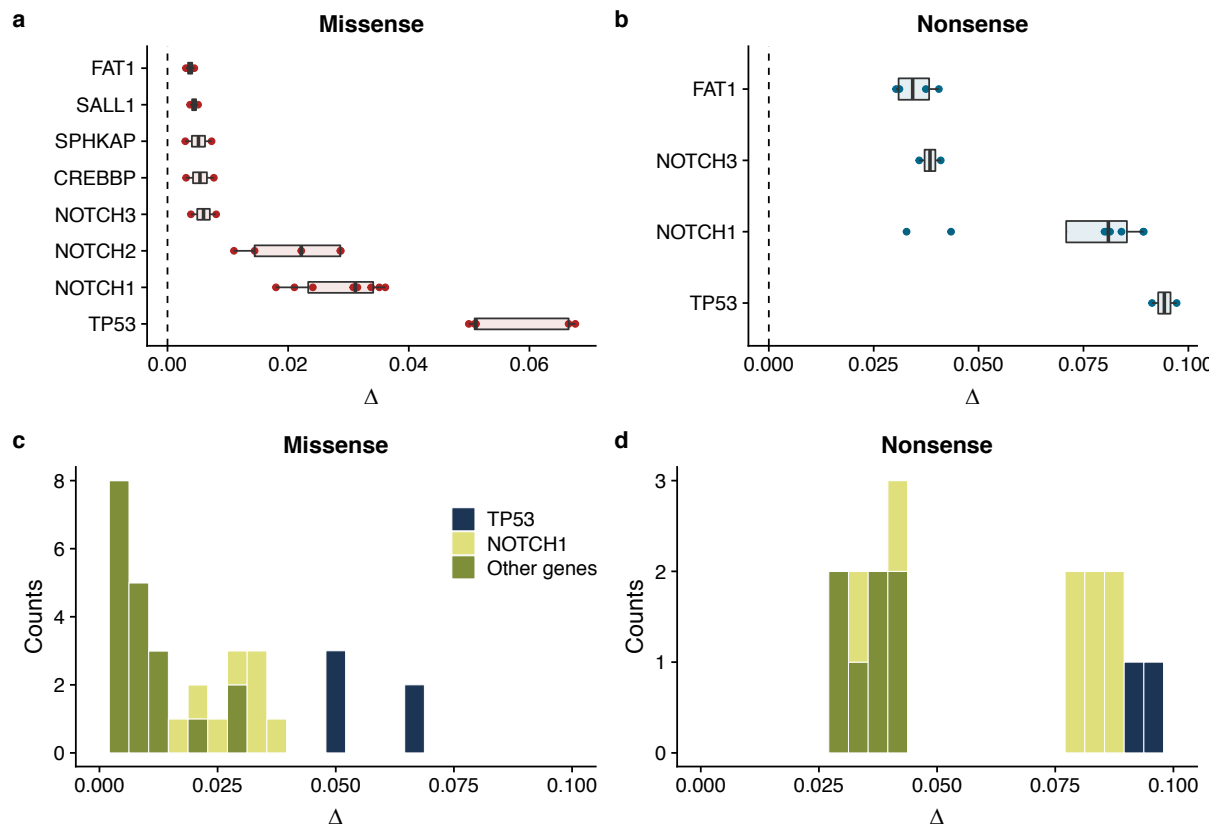

**Figure 3**

Summary of model fits across all patients for normal oesophagus data. Inferred biases  $\Delta$  for genes where at least 2 patients had good model fits ( $R^2 > 0.6$  &  $> 7$  mutations) for missense mutations **a**, and nonsense mutations **b**. Inferred distribution of fitness effects for all genes across all patients for missense mutations **c**, and nonsense mutations **d**.

We then fitted the data on a gene-by-gene and patient-by-patient basis for cases where sufficient mutations were available to perform the fit (Figure 2e-g; Figure S4). A broad range of selective advantages were inferred (Figure S4&S5). Mutations in *TP53* showed large biases across all patients for both missense,  $\Delta=0.057$  (0.05-0.068 95% CI) and nonsense mutations,  $\Delta=0.094$  (0.091-0.097 95% CI) (Figure 3a-b). This was also true for mutations in *NOTCH1* with  $\Delta=0.029$  (0.019-0.036 95% CI) for missense and  $\Delta=0.072$  (0.034-0.089 95% CI) for nonsense mutations. *NOTCH2*, *PIK3CA*, *CREBBP* and *FAT1* also showed a bias toward self-proliferation in multiple patients (Figures 3a-b), though most had a small effect on fitness (range 0.003 – 0.029 for missense mutations and 0.030 – 0.041 for nonsense mutations). Together these data suggest a distribution of fitness effects (DFE) characterized by many small effect mutations with few large effect mutations (Figures 3c-d), as in seen in organismal evolution<sup>2</sup>.

### Driver mutation selective advantage in normal skin

Martincorena and colleagues have also published data on the expansion of driver mutations in ostensibly normal human skin<sup>18</sup>. Analyses of these data with interval dN/dS revealed a per-patient average selective advantage per mutation (again measured in terms of the bias towards self renewal  $\Delta$ ) of  $\Delta=0.001$  for missense mutations and four-fold higher for  $\Delta=0.004$  for nonsense mutations (Figures S6a-c). Performing the analysis on a gene-by-gene

279 basis was limited by the low detected number of mutations, and the limited frequency  
 280 range (clone size range). Good fits to the data were obtainable for *NOTCH1* missense  
 281 mutations in patient PD18003 with fitness estimated to be  $\Delta=0.0149$  (0.0148-0.0150 95%  
 282 CI), and TP53 missense mutations also in patient PD18003,  $\Delta=0.0054$  (0.0051-0.0058 95%  
 283 CI) Figure S6. These fitness coefficients were similar to the oesophagus data. For missense  
 284 mutations we were also able to produce the distribution of fitness effects across the skin  
 285 cohort, which showed similar characteristics to the oesophagus data of a small number of  
 286 high effect mutations and a larger number of smaller effect mutations, Figure S6f.  
 287

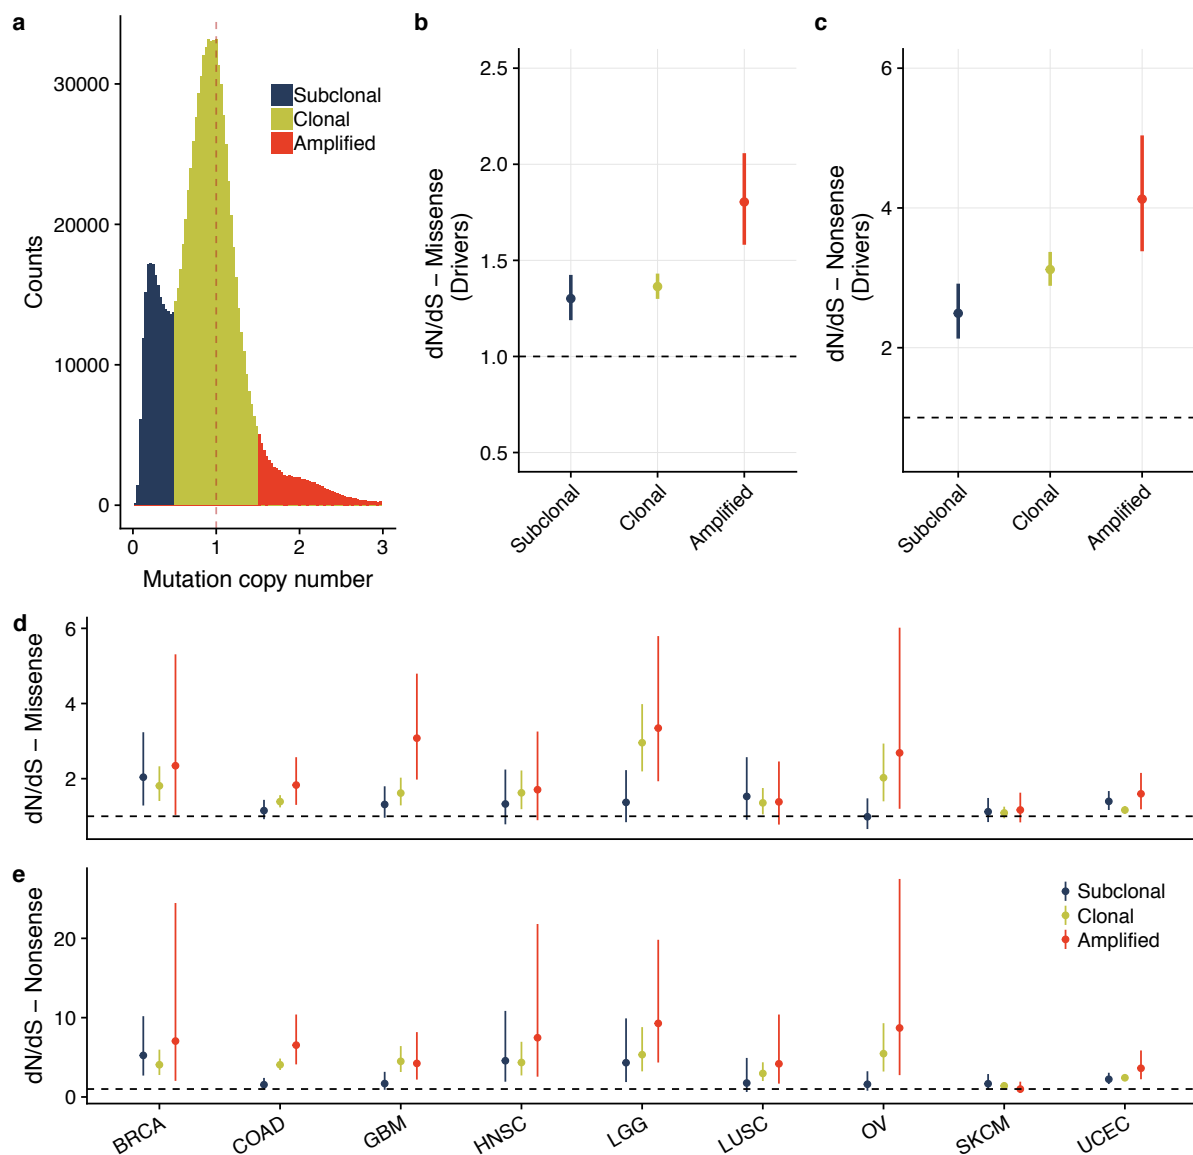

288  
 289  
 290

**Figure 4**

Mutation copy number histogram across 2,619 TCGA samples coloured by mutation clonality, **a**. dN/dS by mutation clonality for missense, **b** and nonsense **c** mutations in a panel of 192 high confidence driver genes. The same analysis done per cancer type for missense **d** and nonsense **e**.



## 291 **Clonal mutations have greater dN/dS than subclonal mutations in cancers**

292 We next investigated the selective advantage of driver mutations in cancer. We first  
293 investigated whether or not differences existed between dN/dS values for clonal mutations  
294 (ie truncal, present in all cells in a cancer) and subclonal mutations (present in a subset of  
295 cells in a cancer) were apparent. Using sequencing data from 2,619 cancers from TCGA that  
296 had sufficient cellularity and depth (see Methods) we calculated the mutation copy number  
297 (MCN) for each mutation and grouped mutations into subclonal, clonal and amplified across  
298 the cohort, where mutations with  $MCN < 1$  were subclonal,  $MCN == 1$  were clonal and  $MCN$   
299  $> 1$  were amplified (Figure 4a). We then calculated global dN/dS ratios for a panel of 198  
300 high confidence driver genes (Methods).

301  
302 Across all cancers, the signal of positive selection was more pronounced for clonal  
303 mutations (Figures 4b-e), with the highest dN/dS values found in amplified mutations<sup>38</sup>.  
304 Subclonal mutations on the other hand demonstrated much lower dN/dS values. The same  
305 pattern was also evident in individual cancer types (Figure 4e,d & S7). In many cancer types  
306 (colorectal, ovarian, glioblastoma) subclonal mutations showed no evidence of subclonal  
307 selection (neutral evolution;  $dN/dS = 1$ ), Figure 4e,d & Figure S7.

## 308 **Interval dN/dS for cancer**

309 We applied our mathematical approach above to calculate i-dN/dS in cancer evolution. In  
310 cancer evolution  $g(\theta, \mu, s, f)$  must account for tumour growth dynamics and subclonal  
311 mutations which may rise and fall in frequency due to selection and drift. The well-studied  
312 Luria-Delbrück distribution and its extensions describes these dynamics<sup>39</sup>. Specifically, the  
313 Luria-Delbrück distribution describes the expected number of mutational lineages at a  
314 particular frequency assuming an underlying birth-death process for individuals in the  
315 population. For neutral mutations the site frequency spectrum has a characteristic  $\frac{1}{f^2}$   
316 dependence, where  $f$  is the frequency of the mutations<sup>35,40</sup>. Hence:

$$317 \quad g(\theta, \mu_p, s = 0, f) = \frac{\mu_p}{\beta_p} \frac{1}{f^2} \quad [7]$$

318  
319 where  $\mu_p$  is the passenger mutation rate and  $\beta_p$  is the survival probability of a lineage at  
320 division. We previously showed that in many cancers across types (approx. 30% of cases),  
321 subclonal mutations closely follow the prediction of this neutral model<sup>26</sup>.

322  
323 Extensions to the classic Luria-Delbrück distribution describe the differential fitness of  
324 mutants. We defined the relative fitness advantage  $s$  as the ratio of net growth rates between  
325 wildtype 'passenger' mutations ( $\lambda_p$ ) and driver mutations ( $\lambda_d$ ):

$$326 \quad s = \frac{\lambda_d}{\lambda_p} - 1 \quad [8]$$

327  
328  
329  $s > 0$  indicated positive selection while  $s < 0$  indicated negative selection. We also defined  
330 the birth and death rates of the respective wildtype (passengers) and mutants (drivers) as  
331  $b_p, d_p, b_d$  and  $d_d$ . Here, the site-frequency distribution again follows a power law but with  
332 exponent dependent on the relative fitness advantage of the mutant<sup>35,40</sup>:  
333  
334  
335

336

$$g(\theta, \mu_d, s \neq 0, f) = \frac{N\mu_d b_p \Gamma(\frac{2+s}{1+s})}{\beta_d^{1+s} b_d \frac{2+s}{N^{1+s}} \frac{1}{f^{1+s}}} \quad [9]$$

337

338 Here, N is the tumour population size at the time of sampling. Using these expressions  
 339 (equations 7&9), we derive  $i\text{-dN/dS}$  (see Methods). The equation exhibits the same  
 340 qualitative behaviour as for the stem cell model, in that  $dN/dS$  increases as a function of  
 341 frequency for positive selection and decreases for negative selection (Figure 5a). Using a  
 342 simulation-based model to generate synthetic data, we confirmed the accuracy of the  
 343 model by accurately recovering the inputted selection coefficient by application of the  
 344 theoretical model and maximum likelihood inference (Figure 5a).  
 345

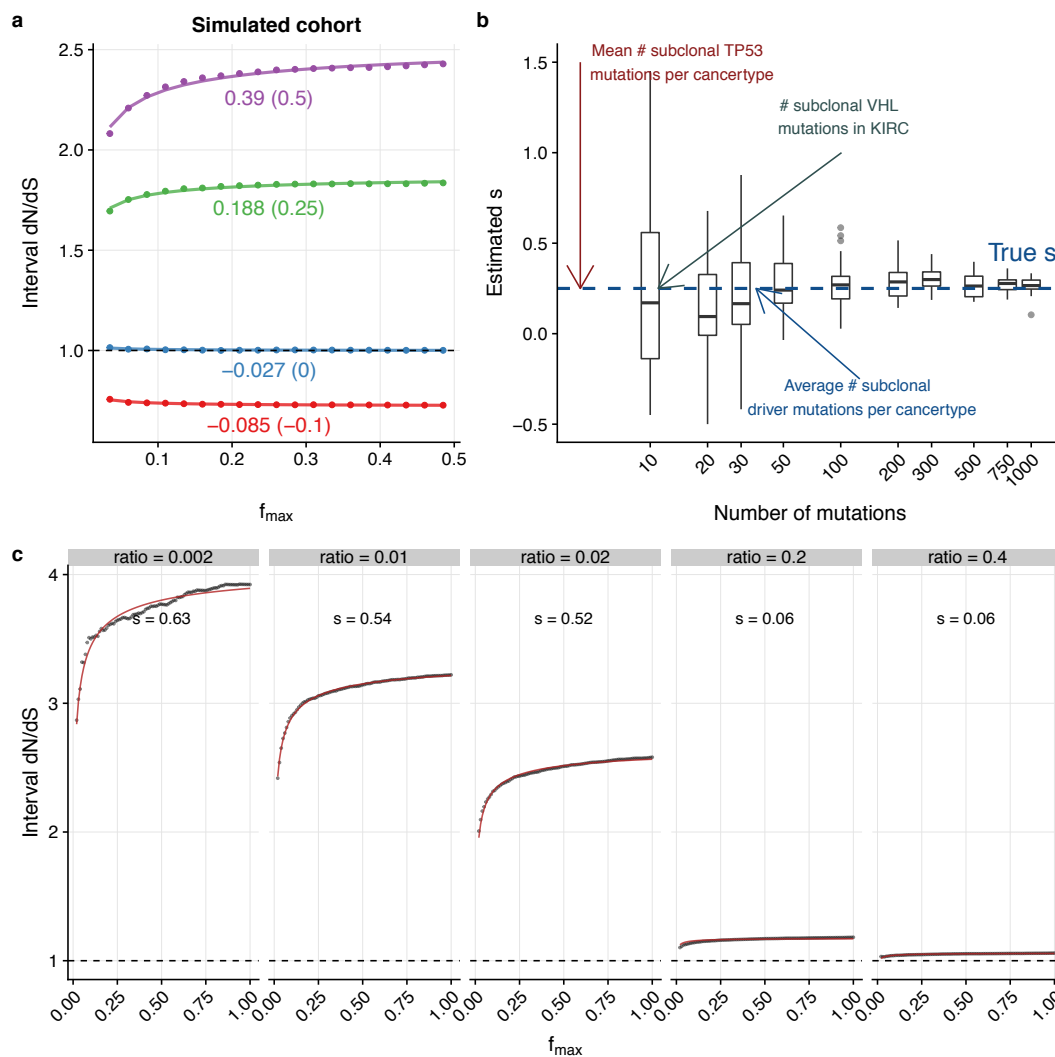

346

### Figure 5

Interval  $dN/dS$  as a function of frequency for 4 simulated cohorts where driver mutations induce different selective advantages, **a**. Points are simulated data and lines are model fits, under each line is the inferred selective advantage and the true selective advantage in brackets. Power to correctly infer the selection coefficient depends on the number of mutations in the cohort, **b**. We generated a cohort of 1000 tumours and then subsampled the mutations (50 times) and inferred the selection coefficient. For TCGA we are limited by a small number of subclonal drivers to accurately perform the inference. The ratio of the driver mutation rate to passenger mutation rate has a strong influence on  $dN/dS$ , **c**. Here we generated synthetic cohorts where the strength of selection of driver mutations was 0.5, and different ratio of driver mutation rate to passenger mutation rate. When drivers are rare,  $dN/dS > 1$  and we can accurately apply our model. When drivers are frequent compared to passengers we observe strong hitchhiking effects which results in  $dN/dS \sim 1$ .

347 Subclonal dN/dS is strongly influenced by the ability to resolve low frequency variants. We  
348 generated synthetic tumour cohorts that modelled subclonal selection, and simulated  
349 'perfect sensitivity' for mutation detection. In these cases, where all mutations were  
350 resolved, we measured  $dN/dS \approx 1$  (and hence infer a selection coefficient of 0), despite some  
351 lineages being positively selected (Figure S9). If only higher frequency variants were  
352 analysed, then the measured  $dN/dS > 1$  and the correct selective coefficient is inferred  
353 (Figure S9). We note that at very low frequencies the detected mutations are newly arisen  
354 in the population, and so are as yet 'unfiltered' by selection. Consequently the ratio of non-  
355 synonymous to synonymous mutations is expected to be proportional to the respective  
356 mutation rates of the two mutation types. The abundance of low frequency mutations also  
357 increases exponentially with decreasing clone frequency, and so including very low-  
358 frequency variants 'drowns out' the effects of selection (Figure S9C). We note that the  
359 limited sequencing data of the majority of currently available cancer genomic data means  
360 that typically only high frequency variants are detected.

361

### 362 **Currently available cancer sequencing data is insufficient to infer selective advantages**

363 Limitations in the quality of currently available sequencing data meant that the theoretically  
364 predicted frequency dependence of dN/dS values could not be assessed in cancer genomics  
365 data (Figure S8). Limited sequencing depth introduces uncertainty into the determination  
366 of variant allele frequencies ("sequencing noise") which can result in incorrect classification  
367 of mutation clonality. Visual inspection of the mutation copy number histogram for TCGA  
368 data (Figure 4a) showed a very broad dispersion of MCNs, and the resolution at lower  
369 (subclonal) frequencies was particularly poor. Issues arising due to sequencing noise are  
370 exacerbated in the setting of dN/dS analysis where pooling the data from multiple patients  
371 with different sequencing depth and purities is required. Consequently, the range of  
372 subclonal frequencies where interval dN/dS could be calculated was severely restricted.

373

374 We tested whether or not looking at individual genes (rather than individual mutations)  
375 allowed for measurement of the DFE. However, the lack of recurrent subclonal mutations  
376 on a gene-by-gene basis precluded this approach. Power calculations predicted that a  
377 minimum of 30 subclonal mutations in a given gene were required to accurately fit the  
378 interval dN/dS model (Figure 5b). This level of subclonal recurrence of individual mutations  
379 was not seen in the data: for example, the average number of subclonal mutations in *TP53*  
380 per cancer type, as well as the number of subclonal VHL mutations (which has been  
381 reported to occur subclonally at an appreciable frequency<sup>41</sup>) were both well below this  
382 cutoff (Figure 5B). Consequently, large cohorts of tumours sequenced to higher depth are  
383 required to apply this approach.

384

385 Aside, we note that the traditional dN/dS approach, and also our modelling framework,  
386 assumes that mutations are independent, and consequently the possibility of hitchhiking of  
387 mutations (e.g. nested driver mutations within clones) is neglected. In simulated data, we  
388 observed high mutation rates for both driver and passenger mutations led to hitchhiking  
389 being common, and subsequent obscuring of the signal of selection (Figure 5c). In extreme  
390 cases this led to  $dN/dS = 1$  (apparent neutral evolution) even in the presence of multiple  
391 selected lineages. For most cancers, the number of driver mutations per cancer is thought  
392 to be low ( $<10$ )<sup>3</sup>, but nevertheless in hypermutator cancers the hitchhiking effect is likely to  
393 be common. Thus, despite hypermutator tumours tending to have fewer copy-number

394 alterations and hence less problematic estimation of MCNs, the prevalence of hitchhiking  
395 precludes analysis of these tumours.

396

## 397 Discussion

398

399 Here we have shown that the combination of dN/dS values with mutation frequency-based  
400 information provides additional quantitative insight into dynamics of somatic evolution than  
401 either method alone. Specifically, the combined approach enables direct inference of the  
402 selection coefficients of mutations in somatic tissues.

403

404 Using this methodology we have begun the construction of the distribution of fitness effects  
405 (DFE) in somatic evolution (Figure 3c,d & Figure S6f). In histologically normal epithelium,  
406 mutations of most genes considered showed minimal effects on fitness (near-neutral  
407 evolution), though selection coefficients for some loci, foremost *NOTCH1* and *TP53* were  
408 considerable (>1% and >5% respectively), and consequently the DFE has most mass close to  
409  $s=0$  with a long right-tail of highly-selected variants. We observed that values of selective  
410 coefficients of individual genes varies between patients, likely because of inter-patient  
411 difference in the precise location of point mutations, but potentially also because of inter-  
412 patient variation in selective pressure from the microenvironment. Nevertheless, the  
413 comparative rank of per-gene fitness coefficients was broadly consistent across patients.  
414 This consistency in selective coefficients is in agreement with the observation highly  
415 recurrent gene mutations in cancer<sup>42</sup> and evidence of repeatability in cancer evolution<sup>43</sup>.

416

417 We have previously measured fitness effects in individual cancers (but were unable to  
418 ascribe fitness changes to individual genes) finding increases in growth rate in a selected  
419 clone approaching 100% in some cases<sup>27</sup>. Care must be taken when comparing selective  
420 coefficients between normal and cancer populations, because in the former we quantify  
421 selection as tilt away from homeostasis and towards net growth of a lineage, whereas in  
422 cancer we infer the relative growth rate of a clone within the tumour as a whole. With this  
423 important caveat in mind, nevertheless the fitness increases observed in cancer appear to  
424 be much larger than for normal tissues. We hypothesise that this is because the effect of  
425 selection is weaker in expanding populations like cancer, wherein the generation of a  
426 subclonal expansion requires very large increases in fitness<sup>44</sup>.

427

428 On a cautionary note, our theoretical work shows that the clonality of mutations strongly  
429 determine the observed value of dN/dS, and so a misleading picture of the selective forces  
430 operating in a tumour (or healthy tissue) will be produced if dN/dS frequency-dependent  
431 effects are not corrected for. The accuracy of any estimate of evolutionary dynamics from  
432 dN/dS values is of course dependent of the underlying accuracy of the dN/dS measure itself,  
433 which is compromised by uncharacterised variability in the mutation rate across the  
434 genome<sup>45</sup> and in the uncertain pathogenicity of individual single nucleotide variants  
435 (extensions to estimate site level selection coefficients may circumvent some of these  
436 issues<sup>46,47</sup>). Finally, we note that dN/dS measures cannot elucidate evolutionary pressures in  
437 individual samples as insufficient (subclonal) mutations will be found at any individual locus.  
438 dN/dS cohort measurements are sensitive to outliers, where a few patients with high  
439 selection can drive the results<sup>48</sup>. Other approaches, such as using the site frequency  
440 spectrum, are likely more powerful for these types of questions.

441

442 Combining population genetics methods with comparative genomics is a powerful way to  
443 infer selection pressures in human somatic evolution, giving new insight into the  
444 fundamental parameters that determine evolutionary dynamics in health and disease.

445

446 **Acknowledgements**

447 A.S. is supported by the Wellcome Trust (202778/B/16/Z) and Cancer Research UK  
448 (A22909). T.G. is supported by the Wellcome Trust (202778/Z/16/Z) and Cancer Research  
449 UK (A19771). We acknowledge funding from the National Institute of Health (NCI U54  
450 CA217376) to A.S and T.A.G. This work was also supported a Wellcome Trust award to the  
451 Centre for Evolution and Cancer (105104/Z/14/Z). C.P.B. acknowledges funding from the  
452 Wellcome Trust (209409/Z/17/Z).

453

## 454 **Methods**

455

### 456 **TCGA Data Processing**

457 MAF (Mutation Annotation Format) files from the Mutect2 mutation calling algorithm and  
458 copy number segmentation data for 9950 cancers from 26 cancer types were downloaded  
459 from the genomic data commons portal using the TCGAbiolinks R package<sup>49</sup>. Cellularity and  
460 ploidy estimates derived from ASCAT were obtained from COSMIC  
461 (<https://cancer.sanger.ac.uk/cosmic/download>). We then filtered for >2 reads reporting the  
462 variant and >9 reads coverage at each locus in both the tumour and normal sample. We  
463 removed samples where the effective depth (defined as cellularity times depth) was < 50X  
464 and those that had likely undergone genome doubling (ploidy > 2.5). This left 2619 samples  
465 from 17 cancer types which we deemed suitable for analysis.

466

467 Copy number (CN) segmentations together with cellularity estimates were used to correct  
468 the variant allele frequency and produce mutation copy number estimates. We assume that  
469 the observed CN state ( $\overline{CN}$ ) was a combination of signals from the tumour sample and  
470 contamination from normal cells (with two copies) assuming tumour purity  $c$ .

471

$$472 \quad \overline{CN} = c \times CN + 2(1 - c)$$

473

474 With this, log(R) ratios were transformed into copy number states using the following  
475 formula:

$$476 \quad CN = \frac{2(2^{\log(R)} - 1 + c)}{c}$$

477

478 Using these corrected copy number states, mutation copy number (MCN) values were  
479 calculated. Given mutation  $i$  with variant allele frequency  $VAF_i$ , copy number  $CN_i$  at the  
480 locus and cellularity estimate of the tumour  $c$ , the MCN was calculated as follows:

$$481 \quad MCN_i = \frac{CN_i \times VAF_i}{c}$$

482

483 Visual inspection of the MCN histograms (Figure 4a) show a dominant peak at MCN = 1  
484 representing clonal mutations present in a single copy, confirming that the corrections we  
485 applied work as intended.

486

### 487 **Oesophagus and skin data**

488 For the oesophagus and skin data we used mutation calls provided by the original studies. In  
489 the oesophagus data when a mutation was present in multiple adjacent biopsies we used  
490 the sum of the mutation frequency times the area of the biopsies (2mm<sup>2</sup>) as our readout of  
491 clone size and performed the dN/dS analysis on a patient by patient basis.

492

### 493 **dN/dS calculations**

494 For calculating dN/dS ratios the dndscv R package was used which calculates both global  
495 dN/dS ratios across the whole exome or a panel of genes as well as per gene dN/dS ratios  
496 using a covariate based model to infer dN/dS values with a limited number of mutations<sup>3</sup>.

497 In an attempt to enrich for positive selection in some of our analysis we calculated dN/dS  
498 for a subset of 198 high confidence driver genes<sup>50</sup>.

499

500 Over or under filtering of possible germline SNPs is known to influence dN/dS values in  
 501 somatic genomes<sup>3</sup>. We previously found that mutation calls provided by TCGA are likely  
 502 over stringent on filtering germline SNPs resulting in inflated dN/dS values<sup>48</sup>. To circumvent  
 503 this issue, we calculated a baseline dN/dS value by randomly selecting 1,000 genes  
 504 (excluding drivers) and then running dndscv across the whole TCGA cohort, reasoning that  
 505 this should on average return dN/dS = 1, and any deviation from this would be due to  
 506 under/over filtering of SNPs. Repeating this procedure 50 times and then taking the mean  
 507 value gave us our baseline value which we could then subtract from further dN/dS values  
 508 we calculate in our analysis. To confirm this procedure produces the expected result of  
 509 dN/dS = 1 in the absence of selection, we repeated the procedure and again, randomly  
 510 selected 1,000 genes 100 times and then applied the correction (subtracting the calculated  
 511 deviation from 1). As would be expected the mean of this distribution was dN/dS = 1,  
 512 validating our approach, Figure S10.

513

514 To calculate the interval dN/dS measure we took our corrected mutation frequency data  
 515 and determined a low cutoff  $f_{min}$  based on the minimum mutation frequency. We then  
 516 created a vector of frequencies  $f_{max}$  that covered the total range of mutation frequencies  
 517 and calculated dN/dS between  $f_{min}$  and all values of  $f_{max}$ . This allowed us to plot dN/dS as  
 518 a function of  $f_{max}$  and fit our interval dN/dS models.

519

## 520 **Model fitting**

521 We used a maximum likelihood approach to fit our models to the data. Defining the

522 observed interval dN/dS as  $y$  and the model dN/dS as  $\hat{y}(\theta) = \frac{\mu_p \int_{f_{min}}^{f_{max}} g(\theta, \mu_d, s, f) df}{\mu_d \int_{f_{min}}^{f_{max}} g(\theta, \mu_p, s=0, f) df}$ . First

523 of all we define the residuals between the data and the model as  $R = y - \hat{y}$ . Assuming that  
 524 the residuals are normally distributed with mean 0 we can write down the negative log  
 525 likelihood (NLL) as

$$526 \quad NLL(\theta) = - \sum_{y-\hat{y}(\theta)} \log(N(y - \hat{y}(\theta), \mu = 0, \sigma))$$

527 where  $N$  denotes the normal probability density function. We can then find the parameters  
 528  $\theta$  that minimize the NLL and calculate confidence intervals on these estimates using the  
 529 Fisher information matrix.

530

## 531 **Interval dN/dS models**

532 For the stem cell model, using equations [2]-[6] in the main text, interval dN/dS is given by:

$$533 \quad i-\frac{dN}{dS} = \frac{1}{1+\Delta} \left[ \frac{E_i\left(-\frac{\rho A_{max}}{N_{\Delta}(t)}\right) - E_i\left(-\frac{\rho A_{min}}{N_{\Delta}(t)}\right) + \frac{1}{2} \left( \frac{e^{-\frac{\rho A_{max}}{N_{\Delta}(t)}}}{\rho A_{max}} + \frac{e^{-\frac{\rho A_{min}}{N_{\Delta}(t)}}}{\rho A_{min}} \right)}{E_i\left(-\frac{\rho A_{max}}{N(t)}\right) - E_i\left(-\frac{\rho A_{min}}{N(t)}\right) + \frac{1}{2} \left( \frac{e^{-\frac{\rho A_{max}}{N(t)}}}{\rho A_{max}} + \frac{e^{-\frac{\rho A_{min}}{N(t)}}}{\rho A_{min}} \right)} \right]$$

534

535 Where  $E_i$  is the exponential integral  $E_i(x) = - \int_x^{\infty} \frac{e^{-n}}{n} dn$ . Given that the data is in terms of  
 536 area,  $A$  we made the transformation  $f = \rho A$ , where  $\rho$  is density of stem cells per  $\text{mm}^2$ ,  
 537 which we set to 5,000 cells / $\text{mm}^2$  for fitting.

538

539 For the cancer model, interval dN/dS is given by:

$$540 \quad i- \frac{dN}{dS} = \frac{\mu_p \int_{f_{min}}^{f_{max}} C_{selection} df}{\mu_d \int_{f_{min}}^{f_{max}} C_{neutral} df} = N^{\frac{s}{1+s}} (1+s) \frac{\beta_p}{\beta_d^{\frac{1}{1+s}}} \frac{b_p}{b_d} \Gamma\left(\frac{2+s}{1+s}\right) \frac{f_{min}^{\frac{-1}{1+s}} - f_{max}^{\frac{-1}{1+s}}}{\frac{1}{f_{min}} - \frac{1}{f_{max}}}$$

541

542 We note that in the cancer setting because the final population size N is generally unknown

$$543 \quad \text{we fit the model } \hat{y}(\theta = \{A, s\}) = A \times \frac{\frac{-1}{f_{min}^{1+s}} - \frac{-1}{f_{max}^{1+s}}}{\frac{1}{f_{min}} - \frac{1}{f_{max}}}.$$

544

545 For a detailed description of the mathematical background of the clone size distribution in

546 these models and comparison with simulation see the supplementary Jupyter notebooks.

547

## 548 Simulations

549

550 To confirm our analytical models and investigate the influence of uncertainty in mutation  
 551 frequencies due to sequencing noise and to challenge some of the underlying assumptions  
 552 of our theoretical approach, we developed 2 simulation based models. The first one models  
 553 cancer evolution and the second models stem cell evolution under homeostasis. For the  
 554 cancer evolution model, we adapted our previously described model<sup>27</sup> so that mutations  
 555 can be one of two types, neutral passengers or mutations that have an effect on fitness of  
 556 cells (either positive or negative). We model cancer growth as a continuous time branching  
 557 process. At each division, daughter cells acquire mutations with a fitness effect  $s$  at rate  $\mu_d$   
 558 and passenger mutations (which are neutral) at rate  $\mu_p$ . This is implemented by drawing a  
 559 Poisson random variable with mean given by  $\mu_d$  or  $\mu_p$ . Fitness of passenger mutations is 0,  
 560 while driver mutations have fitness advantage  $s$ , where  $s$  is defined by equation [8]. We also  
 561 implemented a model where fitness was a random exponentially distributed variable with  
 562 mean  $s$ .

563

564 For the stem cell model we seed a population of  $N_s$  stem cells that then undergo

565 loss/replacement as described by the following rate equations

566

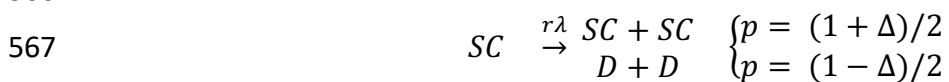

568

569 As only the stem cells are long lived the differentiated cells are not explicitly modelled such  
 570 that when a stem cell “differentiates” it is effectively lost from the population. As in the  
 571 cancer model, during division, daughter cells acquire mutations with a fitness effect at rate  
 572  $\mu_d$  and passenger mutations at rate  $\mu_p$ . Fitness increases the bias toward self-proliferation  $\Delta$   
 573 of a stem cell lineage. Additional driver mutations do not further increase the fitness of  
 574 stem cells.

575

576 To calculate dN/dS across a cohort of simulated tumours or tissue biopsies we count the  
 577 number of driver mutations  $N_d$  and the number of passenger mutations,  $N_p$  and then  
 578 normalize by their respective mutation rates. In our model drivers = non-synonymous and  
 579 thus every driver has an effect on fitness. Then the ratio of these two numbers gives us the  
 580 excess or deficit of mutations due to selection – ie the dN/dS ratio.



581

582

$$\frac{dN}{dS} = \frac{N_d/\mu_d}{N_p/\mu_p}$$

583

584 For the interval  $dN/dS$  we simply calculate the  $N_x$  between  $f_{min}$  and  $f_{max}$ .

585

586 To introduce uncertainty into mutation frequencies we perform a process of empirically  
587 motivated sampling to the true underlying frequency  $f$ . Firstly, we specify the average  
588 depth of sequencing  $D$ , then the depth of sequencing for mutation  $i$  is given by

589

$$D_i = Po(D)$$

590 The sampled number of read counts is then

591

$$n_s = Bo(n = D_i, p = f)$$

592

And the sampled variant frequency is then  $f_s = n_s/D_i$

593

### 594 **Code and data availability**

595

Code used for the analysis are included as a snakemake pipeline which will reproduce all the  
596 analysis and generate all the figures. Julia <sup>51</sup> was used for the majority the simulations and R  
597 <sup>52</sup> was used to analyse the data and generate the figures. Some of the analysis rely in  
598 bespoke packages written for this which are freely available under and open source licence.  
599 Code is available at [github.com/marcjwilliams1/dnds-clonesize](https://github.com/marcjwilliams1/dnds-clonesize).

600

601

602

603 **References**

604

- 605 1. Williams, M. J., Sottoriva, A. & Graham, T. Measuring Clonal Evolution in Cancer with  
606 Genomics. *Annu. Rev. Genom. Hum. Genet. In Press*
- 607 2. Eyre-Walker, A. & Keightley, P. D. The distribution of fitness effects of new mutations.  
608 *Nat Rev Genet* **8**, 610–618 (2007).
- 609 3. Martincorena, I. *et al.* Universal Patterns of Selection in Cancer and Somatic Tissues.  
610 *Cell* 1–35 (2017). doi:10.1016/j.cell.2017.09.042
- 611 4. Vermeulen, L. *et al.* Defining stem cell dynamics in models of intestinal tumor  
612 initiation. *Science* **342**, 995–998 (2013).
- 613 5. Rogers, Z. N. *et al.* Mapping the in vivo fitness landscape of lung adenocarcinoma  
614 tumor suppression in mice. *Nature Genetics* **50**, 483–486 (2018).
- 615 6. Watson, C. J. *et al.* The Evolutionary Dynamics and Fitness Landscape of Clonal  
616 Haematopoiesis. *BioRxiv* 1–34 (2019). doi:10.1101/569566
- 617 7. Körber, V. *et al.* Evolutionary Trajectories of IDHWT Glioblastomas Reveal a Common  
618 Path of Early Tumorigenesis Instigated Years ahead of Initial Diagnosis. *Cancer Cell* 1–  
619 37 (2019). doi:10.1016/j.ccell.2019.02.007
- 620 8. Bailey, M. H. *et al.* Comprehensive Characterization of Cancer Driver Genes and  
621 Mutations. *Cell* **173**, 371–385.e18 (2018).
- 622 9. Weghorn, D. & Sunyaev, S. Bayesian inference of negative and positive selection in  
623 human cancers. *Nature Genetics* **49**, 1–8 (2017).
- 624 10. Zapata, L. *et al.* Negative selection in tumor genome evolution acts on essential  
625 cellular functions and the immunopeptidome. *Genome Biology* **19**, 1–17 (2018).
- 626 11. Wu, C.-I., Wang, H.-Y., Ling, S. & Lu, X. The Ecology and Evolution of Cancer: The  
627 Ultra-Microevolutionary Process. *Annu. Rev. Genet.* **50**, 347–369 (2016).
- 628 12. Greenman, C., Wooster, R., Futreal, P. A., Stratton, M. R. & Easton, D. F. Statistical  
629 analysis of pathogenicity of somatic mutations in cancer. *Genetics* **173**, 2187–2198  
630 (2006).
- 631 13. Yang, Z., Ro, S. & Rannala, B. Likelihood models of somatic mutation and codon  
632 substitution in cancer genes. *Genetics* **165**, 695–705 (2003).
- 633 14. Martincorena, I. *et al.* Somatic mutant clones colonize the human esophagus with  
634 age. *Science* **57**, eaau3879–14 (2018).
- 635 15. Lee-Six, H. *et al.* Population dynamics of normal human blood inferred from somatic  
636 mutations. *Nature* **14**, 213–478 (2018).
- 637 16. Nielsen, R. & Yang, Z. Estimating the distribution of selection coefficients from  
638 phylogenetic data with applications to mitochondrial and viral DNA. *Mol Biol Evol* **20**,  
639 1231–1239 (2003).
- 640 17. McGranahan, N. & Swanton, C. Clonal Heterogeneity and Tumor Evolution: Past,  
641 Present, and the Future. *Cell* **168**, 613–628 (2017).
- 642 18. Sottoriva, A. *et al.* A Big Bang model of human colorectal tumor growth. *Nature*  
643 *Genetics* **47**, 209–216 (2015).
- 644 19. Kryazhimskiy, S. & Plotkin, J. B. The Population Genetics of dN/dS. *PLOS Genet* **4**,  
645 e1000304–10 (2008).
- 646 20. Mugal, C. F., Wolf, J. B. W. & Kaj, I. Why Time Matters: Codon Evolution and the  
647 Temporal Dynamics of dN/dS. *Mol Biol Evol* **31**, 212–231 (2013).
- 648 21. Simons, B. D. Deep sequencing as a probe of normal stem cell fate and preneoplasia  
649 in human epidermis. *PNAS* **113**, 128–133 (2016).

- 650 22. Durrett, R. Population genetics of neutral mutations in exponentially growing cancer  
651 cell populations. *The Annals of Applied Probability* **23**, 230–250 (2013).
- 652 23. Klein, A. M., Brash, D. E., Jones, P. H. & Simons, B. D. Stochastic fate of p53-mutant  
653 epidermal progenitor cells is tilted toward proliferation by UV B during preneoplasia.  
654 *Proc. Natl. Acad. Sci. U.S.A.* **107**, 270–275 (2010).
- 655 24. Lopez-Garcia, C., Klein, A. M., Simons, B. D. & Winton, D. J. Intestinal stem cell  
656 replacement follows a pattern of neutral drift. *Science* **330**, 822–825 (2010).
- 657 25. Vermeulen, L. *et al.* Defining stem cell dynamics in models of intestinal tumor  
658 initiation. *Science* **342**, 995–998 (2013).
- 659 26. Williams, M. J., Werner, B., Barnes, C. P., Graham, T. A. & Sottoriva, A. Identification  
660 of neutral tumor evolution across cancer types. *Nature Genetics* **48**, 238–244 (2016).
- 661 27. Williams, M. J. *et al.* Quantification of subclonal selection in cancer from bulk  
662 sequencing data. *Nature Genetics* **50**, 895–903 (2018).
- 663 28. Bozic, I., Gerold, J. M. & Nowak, M. A. Quantifying Clonal and Subclonal Passenger  
664 Mutations in Cancer Evolution. *PLoS Comput Biol* **12**, e1004731 (2016).
- 665 29. Ling, S. *et al.* Extremely high genetic diversity in a single tumor points to prevalence of  
666 non-Darwinian cell evolution. *Proc. Natl. Acad. Sci. U.S.A.* **112**, E6496–505 (2015).
- 667 30. Simons, B. D. Reply to Martincorena *et al.*: Evidence for constrained positive selection  
668 of cancer mutations in normal skin is lacking. *Proc. Natl. Acad. Sci. U.S.A.* **113**, E1130–  
669 E1131 (2016).
- 670 31. Martincorena, I., Jones, P. H. & Campbell, P. J. Constrained positive selection on  
671 cancer mutations in normal skin. *Proc. Natl. Acad. Sci. U.S.A.* **113**, E1128–E1129  
672 (2016).
- 673 32. Klein, A. M. & Simons, B. D. Universal patterns of stem cell fate in cycling adult  
674 tissues. *Development* **138**, 3103–3111 (2011).
- 675 33. Doupé, D. P. *et al.* A single progenitor population switches behavior to maintain and  
676 repair esophageal epithelium. *Science* **337**, 1091–1093 (2012).
- 677 34. Alcolea, M. P. *et al.* Differentiation imbalance in single oesophageal progenitor cells  
678 causes clonal immortalization and field change. *Nature Cell Biology* **16**, 612–619  
679 (2014).
- 680 35. Nicholson, M. D. & Antal, T. Universal Asymptotic Clone Size Distribution for General  
681 Population Growth. *Bull. Math. Biol.* **78**, 2243–2276 (2016).
- 682 36. Ewens, W. J. Mathematical Population Genetics. 1–435 (2012).
- 683 37. Martincorena, I. *et al.* Tumor evolution. High burden and pervasive positive selection  
684 of somatic mutations in normal human skin. *Science* **348**, 880–886 (2015).
- 685 38. Bielski, C. M. *et al.* Widespread Selection for Oncogenic Mutant Allele Imbalance in  
686 Cancer. *Cancer Cell* 1–24 (2018). doi:10.1016/j.ccell.2018.10.003
- 687 39. Zheng, Q. Progress of a half century in the study of the Luria–Delbrück distribution.  
688 *Math Biosci* (1999). doi:10.1016/S0025-5564(99)00045-0
- 689 40. Kessler, D. A. & Levine, H. Scaling Solution in the Large Population Limit of the  
690 General Asymmetric Stochastic Luria–Delbrück Evolution Process. *J Stat Phys* **158**,  
691 783–805 (2014).
- 692 41. Gerlinger, M. *et al.* Genomic architecture and evolution of clear cell renal cell  
693 carcinomas defined by multiregion sequencing. *Nature Genetics* **46**, 225–233 (2014).
- 694 42. Lawrence, M. S. *et al.* Mutational heterogeneity in cancer and the search for new  
695 cancer-associated genes. *Nature* **499**, 214–218 (2013).

- 696 43. Caravagna, G. *et al.* Detecting repeated cancer evolution from multi- region tumor  
697 sequencing data. *Nat Methods* **15**, 1–13 (2018).
- 698 44. Korolev, K. S. *et al.* Selective sweeps in growing microbial colonies. *Phys Biol* **9**,  
699 026008 (2012).
- 700 45. Van den Eynden, J. & Larsson, E. Mutational Signatures Are Critical for Proper  
701 Estimation of Purifying Selection Pressures in Cancer Somatic Mutation Data When  
702 Using the dN/dS Metric. *Front. Genet.* **8**, 415–9 (2017).
- 703 46. Cannataro, V. L., Gaffney, S. G. & Townsend, J. P. Effect Sizes of Somatic Mutations in  
704 Cancer. *JNCI Journal of the National Cancer Institute* **110**, 1171–1177 (2018).
- 705 47. Temko, D., Tomlinson, I. P. M., Severini, S., Schuster-Böckler, B. & Graham, T. A. The  
706 effects of mutational processes and selection on driver mutations across cancer  
707 types. *Nat Commun* **9**, 1857 (2018).
- 708 48. Heide, T. *et al.* Reply to ‘Neutral tumor evolution?’. *Nature Genetics* **48**, 1–9 (2018).
- 709 49. Colaprico, A. *et al.* TCGAbiolinks: an R/Bioconductor package for integrative analysis  
710 of TCGA data. *Nucleic Acids Research* **44**, e71–e71 (2016).
- 711 50. Martincorena, I. & Campbell, P. J. Somatic mutation in cancer and normal cells.  
712 *Science* **349**, 1483–1489 (2015).
- 713 51. Bezanson, J., Edelman, A., Karpinski, S. & Shah, V. B. Julia: A Fresh Approach to  
714 Numerical Computing. *SIAM Review* (2017)
- 715 52. R Core Team, *R: A Language and Environment for Statistical Computing*, R Foundation  
716 for Statistical Computing, Vienna. 2018
- 717

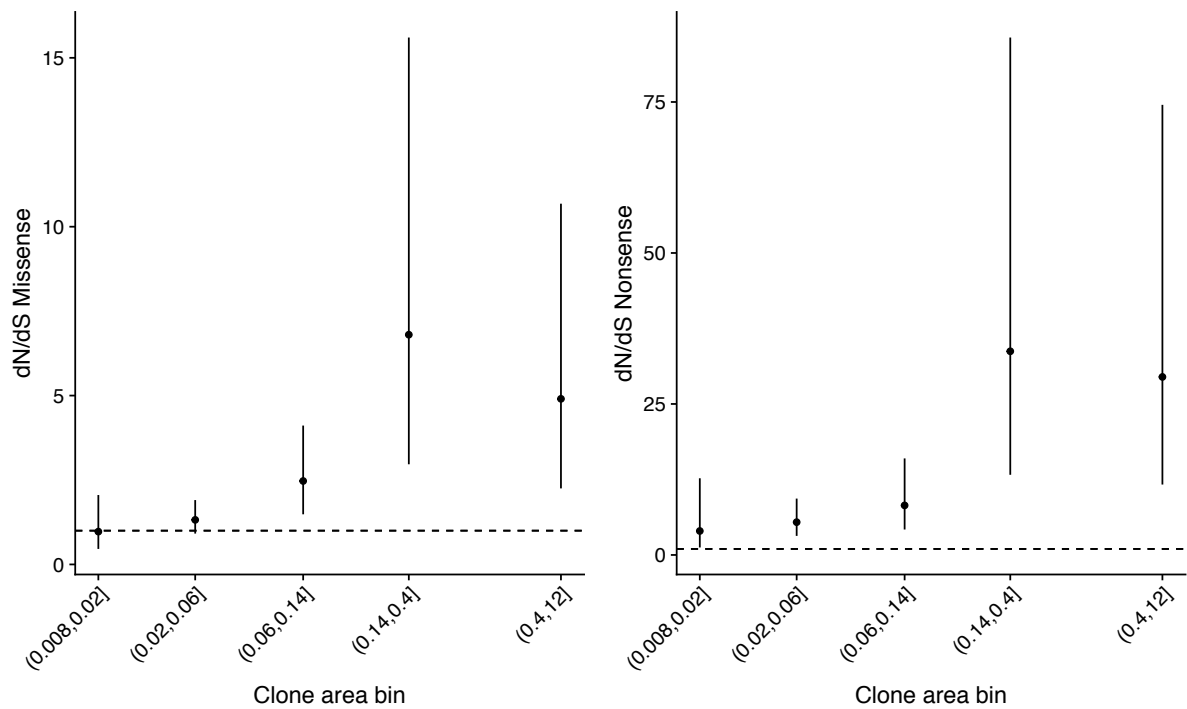

**Figure S1**

Global dN/dS values in different frequency bins for patient PD31182 showing that the values depend on the frequency of mutations.

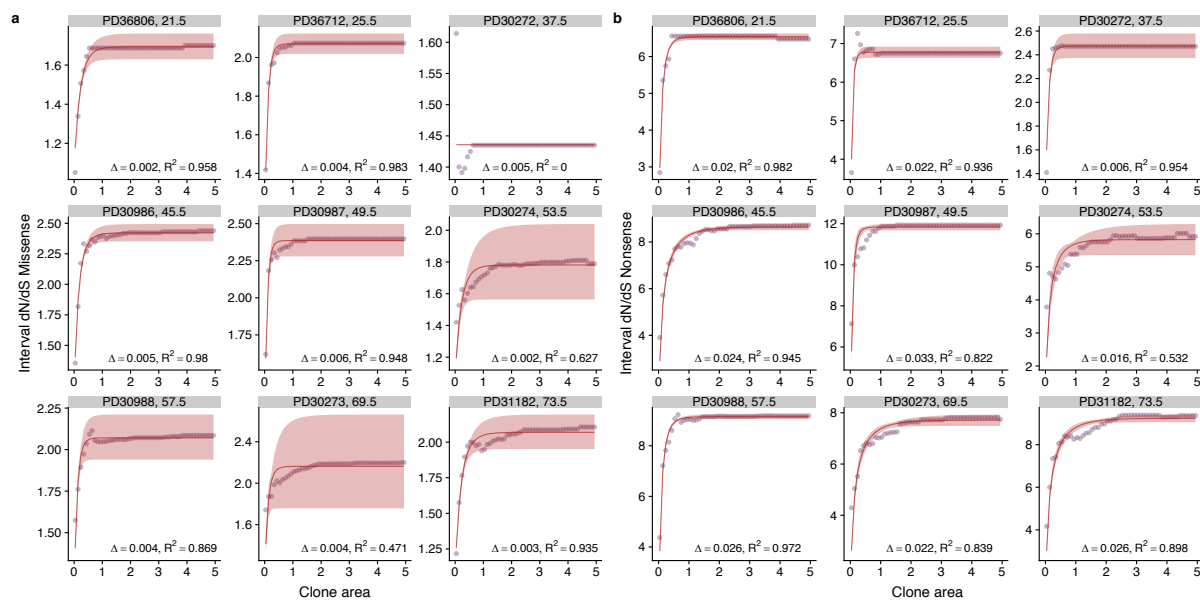

**Figure S2**

Model fits for all patients in the oesophagus data set. Purple points are data and red lines model fits. Fits were performed separately for missense, **a** and nonsense mutations, **b**. Each plot is annotated with the inferred bias  $\Delta$  and the  $R^2$  value.

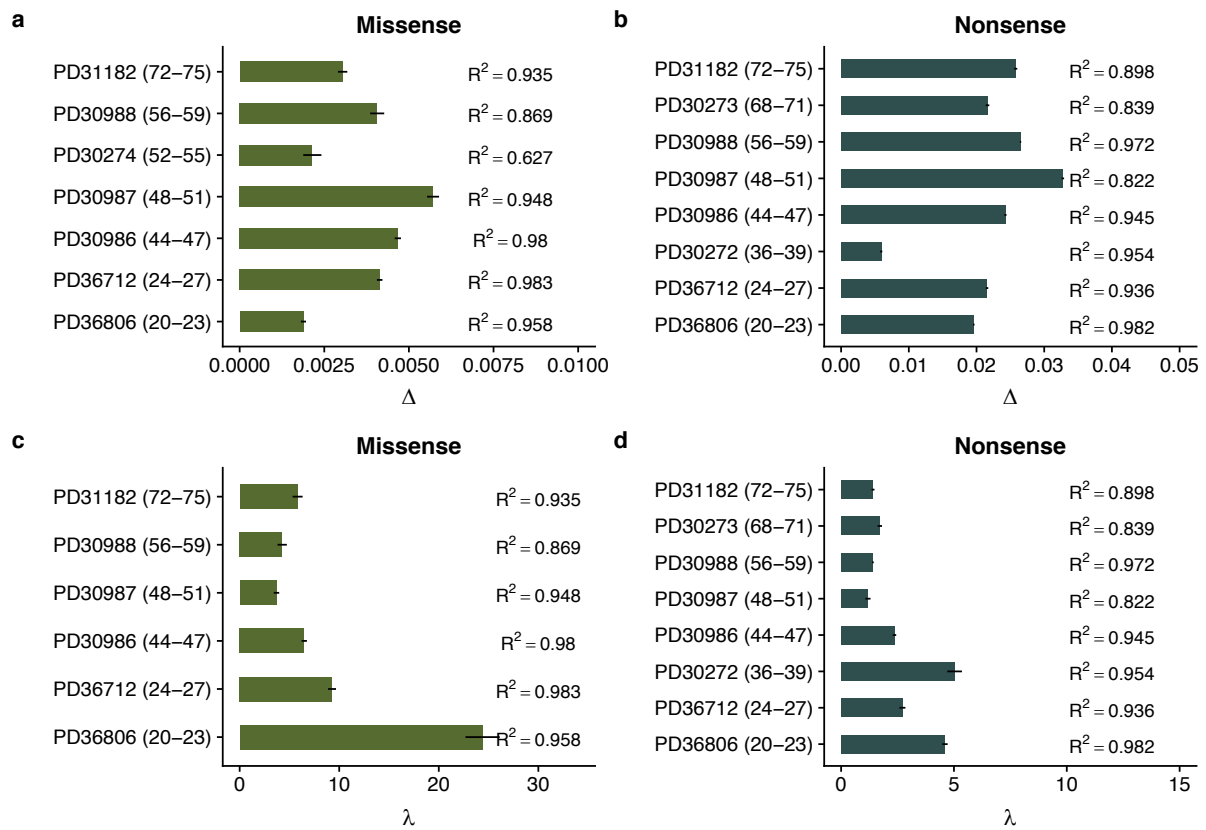

**Figure S3**

Inferred biases for for each patient in the oesophagus dataset based on missense , **a** and nonsense mutations, **b**. Inferred loss replacement rates,  $\lambda$  for each patient based on missense, **a** and nonsense mutations, **b**.

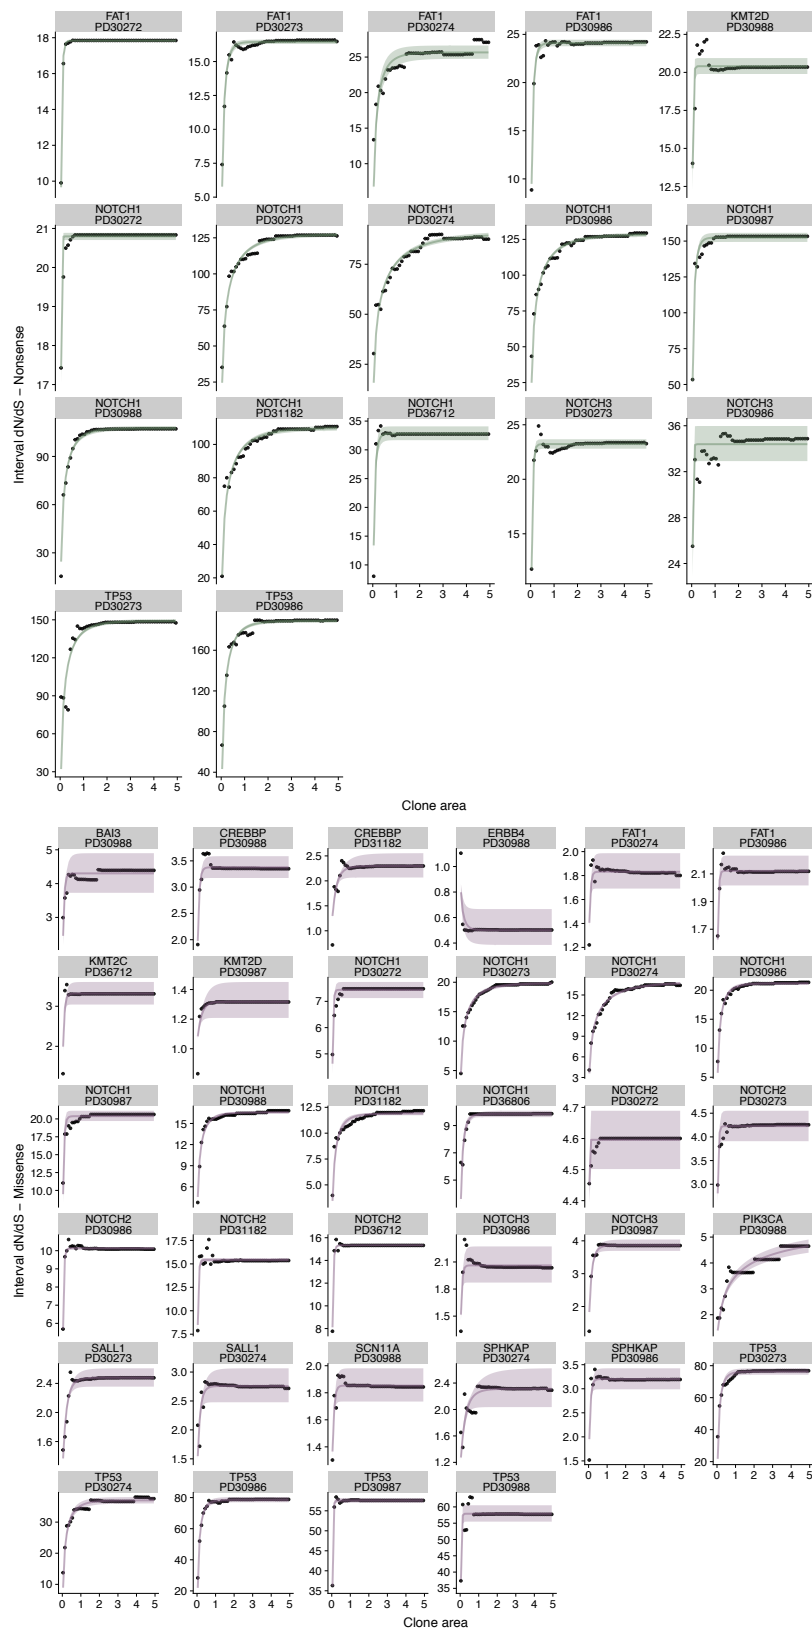

**Figure S4**

Individual fits for each gene in each patient in the oesophagus dataset. Points are data and lines are model fits. Analysis performed separately for nonsense, **a** and missense, **b**.

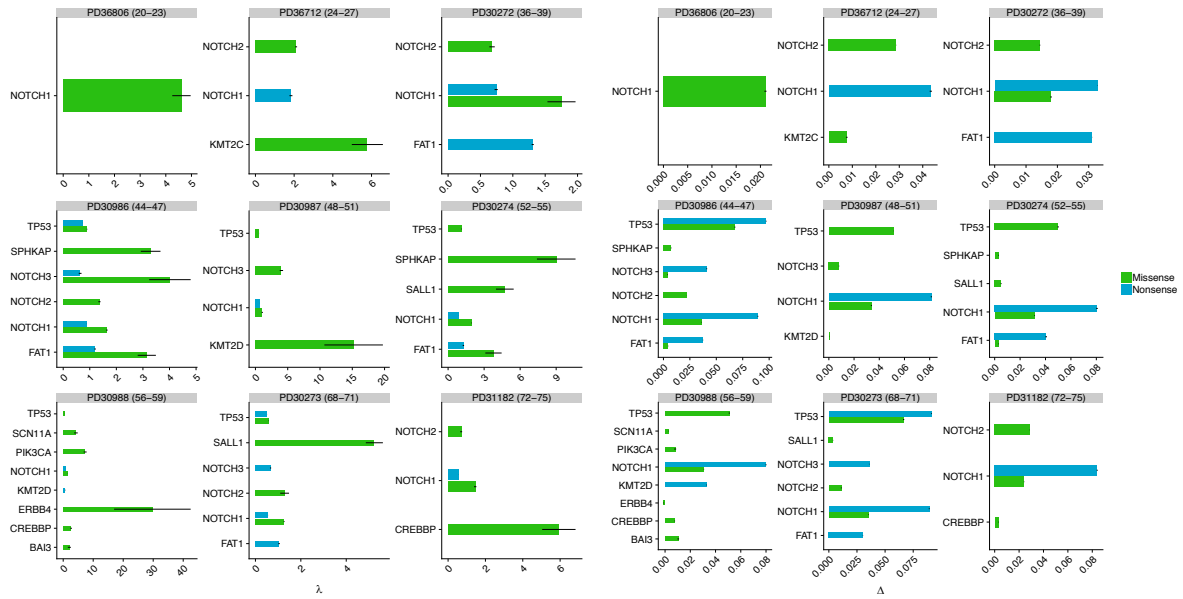

**Figure S5** Inferred parameters for each gene in each patient in the oesophagus dataset where there were sufficient mutations to perform the analysis. Left hand plot shows inferred loss replacement rates  $\lambda$  and right hand plot inferred biases  $\Delta$ .

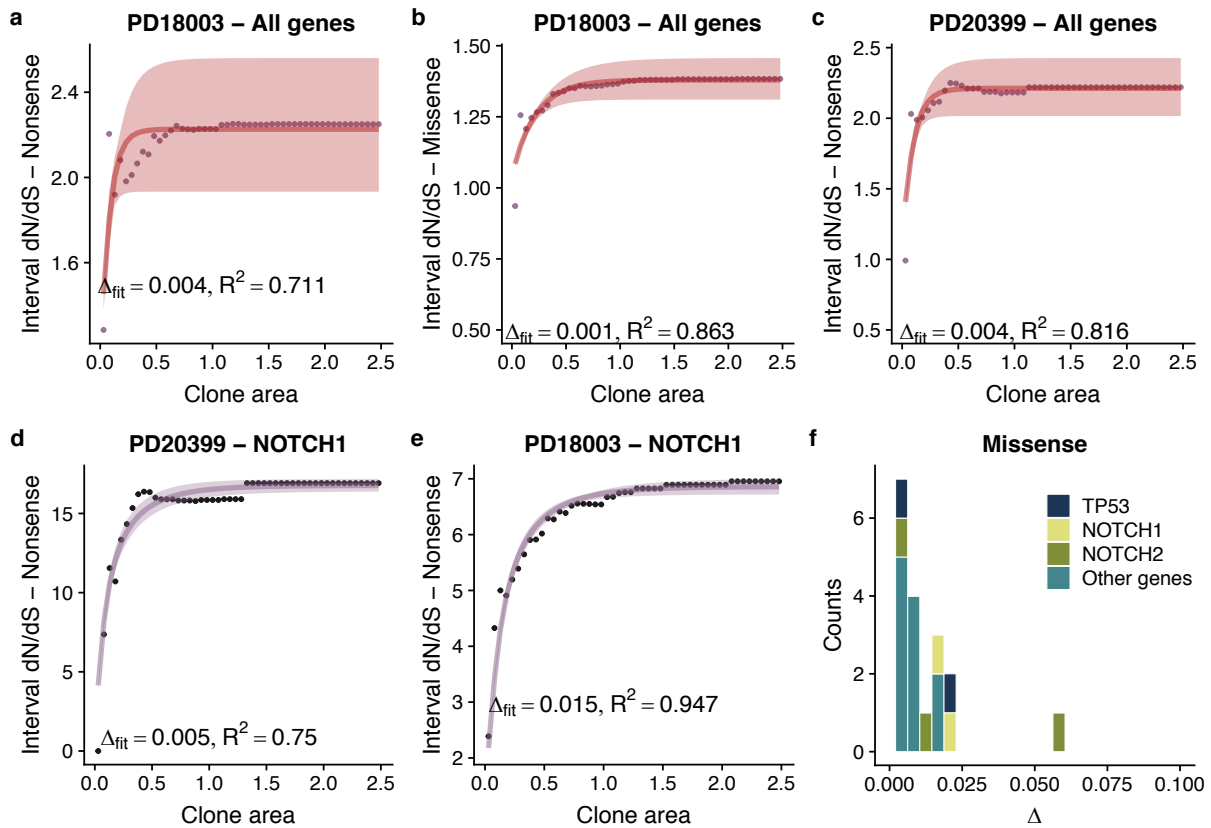

**Figure S6** Model fits per patient and per gene per patient when there were sufficient mutations in the skin dataset. Points are data and lines are model fits, **a-e**. **f** shows the distributions of fitness effects for missense mutations across the cohort. There were insufficient nonsense mutations in the majority of genes to draw the equivalent plot for nonsense mutations.



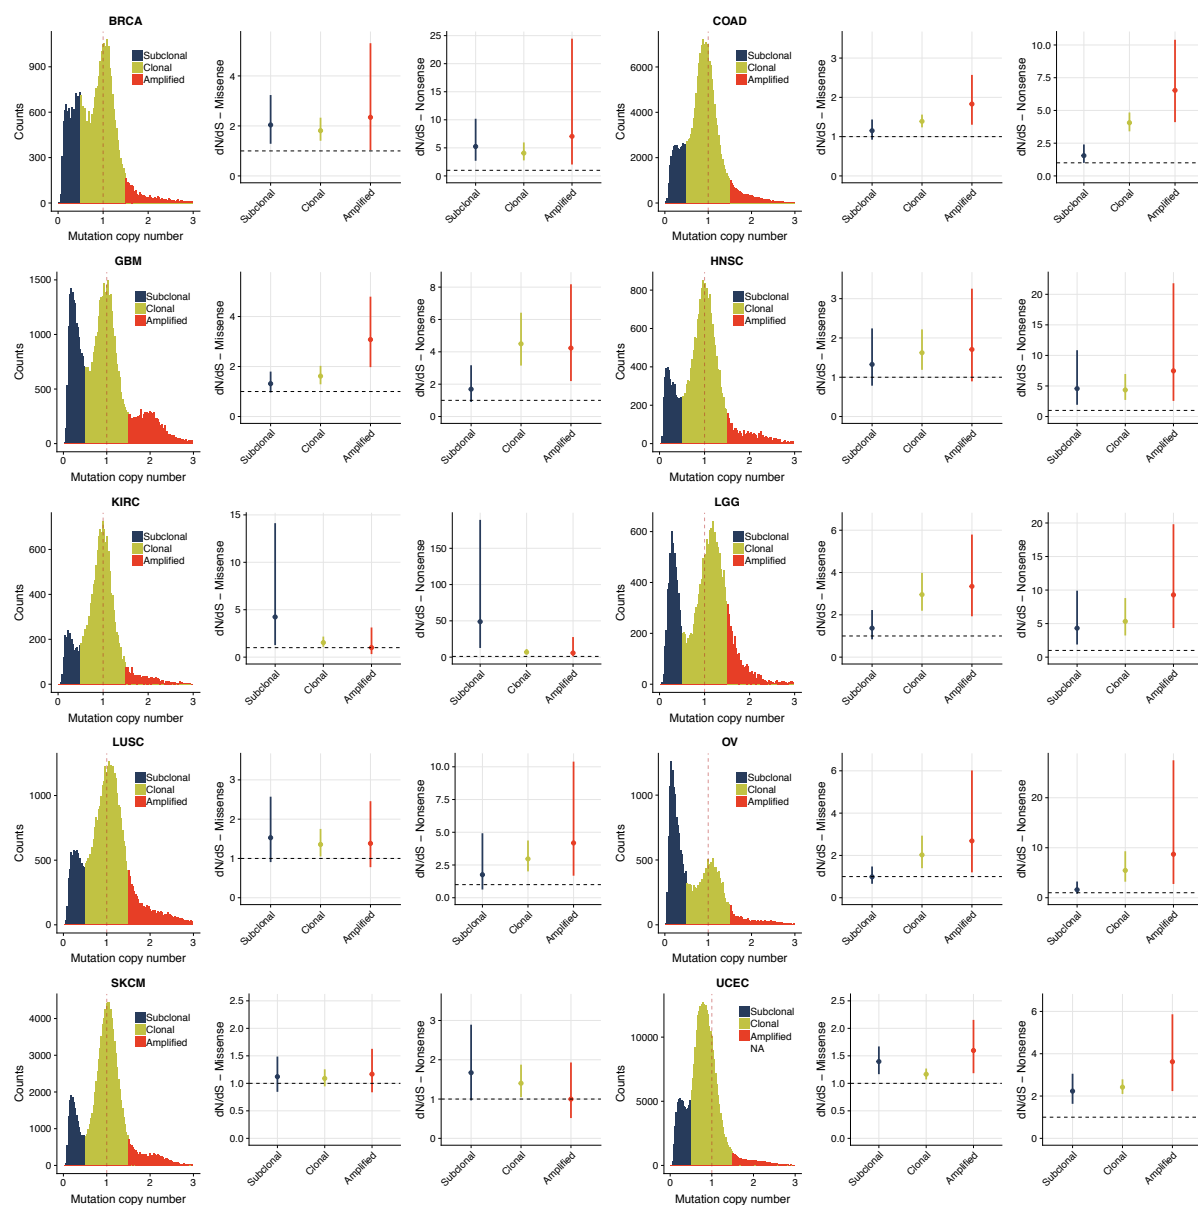

**Figure S7**

Mutation copy number histograms and dN/dS values for different cancer types with >100 samples (post filtering) in TCGA. Histograms and dN/dS plots coloured by mutation clonality.

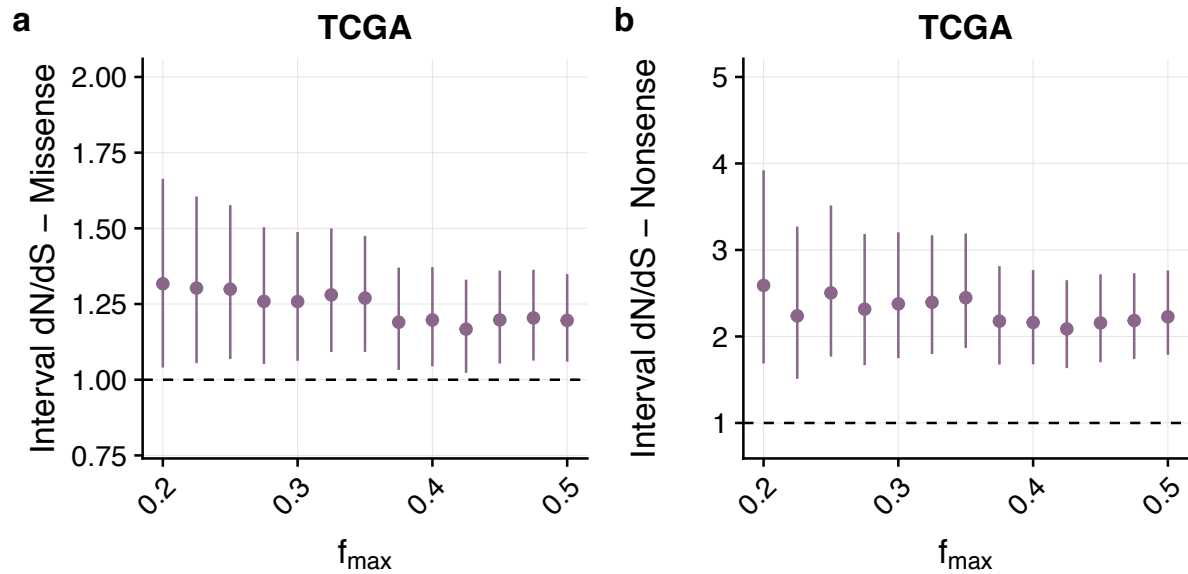

**Figure S8**

Interval dN/dS for 192 high confidence driver mutations. We observe no patterns that are predicted by our theoretical model.

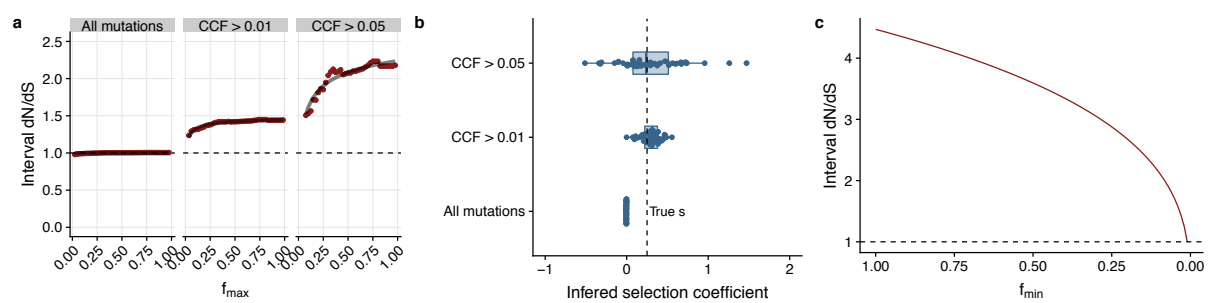

**Figure S9**

Generating a synthetic cohort with selection and using all mutations to infer dN/dS values shows that in this case  $dN/dS \sim 1$ , while if we restrict our attention to high frequency variants  $dN/dS > 1$ . **a.** Inferred selection coefficients are accurate only when using high frequency variants, **b.** Using our theoretical interval model equation we see that fixing  $f_{min} = 1$  and taking the limit  $f_{min} \rightarrow 0$  results in  $dN/dS = 1$ .

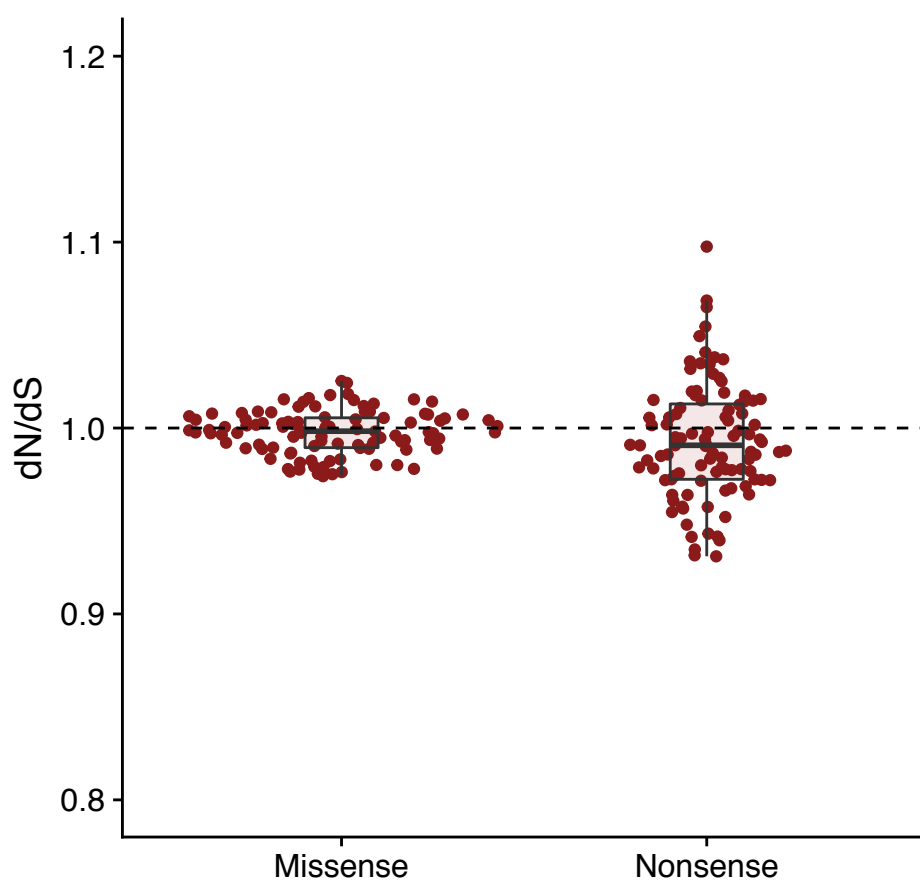

**Figure S10**

Corrected dN/dS values from 100 sets of 1000 randomly samples genes. Average dN/dS ~ 1 as would be expected.
